# Supplementary material for: Outlier-Based Identification of Copy Number Variations Using Targeted Resequencing in a Small Cohort of Patients with Tetralogy of Fallot
Source: PubMed Central journal article supplement (PMC3882271; doi:10.1371/journal.pone.0085375), 2014-01-06
Supplement: pone.0085375.s001.pdf [file pone.0085375.s001.pdf]

**Table S1. Initial transition and emission probabilities of the HMM.**

|               | <b>Gain</b> | <b>Loss</b> | <b>Normal</b> |
|---------------|-------------|-------------|---------------|
| <b>Gain</b>   | 0.6         | 0.2         | 0.2           |
| <b>Loss</b>   | 0.2         | 0.6         | 0.2           |
| <b>Normal</b> | 0.2         | 0.2         | 0.6           |
