# Supplementary material for: Outlier-Based Identification of Copy Number Variations Using Targeted Resequencing in a Small Cohort of Patients with Tetralogy of Fallot
Source: PubMed Central journal article supplement (PMC3882271; doi:10.1371/journal.pone.0085375), 2014-01-06
Supplement: pone.0085375.s002.pdf [file pone.0085375.s002.pdf]

**Table S2. CNVs found in the five HapMap samples using type10 Dixon's Q test in the outlier-based CNV calling method.**

| <b>Chr</b> | <b>Start position (hg19)</b> | <b>End position (hg19)</b> | <b>Type of variation</b> | <b>HapMap sample</b> |
|------------|------------------------------|----------------------------|--------------------------|----------------------|
| chr1       | 155,234,407                  | 155,237,870                | gain                     | NA15510              |
| chr1       | 155,253,768                  | 155,261,736                | gain                     | NA15510              |
| chr2       | 240,981,511                  | 240,982,011                | gain                     | NA12878              |
| chr3       | 19,559,462                   | 19,924,248                 | gain                     | NA15510              |
| chr3       | 20,164,156                   | 20,181,845                 | gain                     | NA15510              |
| chr3       | 20,215,780                   | 20,216,280                 | gain                     | NA15510              |
| chr4       | 68,795,606                   | 68,925,183                 | gain                     | NA18517              |
| chr4       | 68,928,187                   | 68,928,787                 | gain                     | NA18517              |
| chr4       | 68,930,393                   | 68,934,496                 | gain                     | NA18517              |
| chr5       | 69,717,189                   | 69,718,089                 | gain                     | NA18517              |
| chr5       | 69,729,631                   | 69,730,131                 | gain                     | NA18517              |
| chr5       | 70,308,153                   | 70,308,653                 | gain                     | NA18517              |
| chr7       | 99,564,684                   | 99,621,311                 | gain                     | NA15510              |
| chr9       | 108,456,919                  | 108,536,213                | gain                     | NA15510              |
| chr9       | 117,087,073                  | 117,092,300                | gain                     | NA15510              |
| chr9       | 40,773,663                   | 40,774,263                 | gain                     | NA12878              |
| chr9       | 41,590,682                   | 41,592,182                 | gain                     | NA12878              |
| chr11      | 4,967,401                    | 4,968,201                  | gain                     | NA19240              |
| chr11      | 5,878,066                    | 5,878,966                  | loss                     | NA19240              |
| chr11      | 6,190,624                    | 6,191,524                  | loss                     | NA19129              |
| chr12      | 133,721,045                  | 133,733,489                | gain                     | NA19240              |
| chr12      | 133,764,519                  | 133,768,587                | gain                     | NA19240              |
| chr12      | 133,778,781                  | 133,779,381                | gain                     | NA19240              |
| chr14      | 106,539,004                  | 106,539,504                | gain                     | NA19240              |
| chr14      | 106,780,499                  | 106,781,099                | gain                     | NA19240              |
| chr14      | 21,359,867                   | 21,423,999                 | loss                     | NA19240              |
| chr16      | 21,623,981                   | 21,636,326                 | gain                     | NA18517              |
| chr16      | 21,658,494                   | 21,666,721                 | gain                     | NA18517              |
| chr16      | 21,702,877                   | 21,712,336                 | gain                     | NA18517              |
| chr16      | 21,734,219                   | 21,739,705                 | gain                     | NA18517              |
| chr17      | 39,535,858                   | 39,538,575                 | gain                     | NA19240              |
| chr17      | 44,171,932                   | 44,249,515                 | gain                     | NA12878              |
| chr19      | 43,688,932                   | 43,698,720                 | gain                     | NA18517              |
| chr19      | 9,868,776                    | 9,869,276                  | loss                     | NA19129              |
| chr22      | 20,457,890                   | 20,459,090                 | gain                     | NA19129              |
| chr22      | 21,742,009                   | 21,742,909                 | gain                     | NA19129              |
| chr22      | 21,828,820                   | 21,829,620                 | gain                     | NA19129              |
| chr22      | 21,900,797                   | 21,901,297                 | gain                     | NA19129              |
| chr22      | 22,453,213                   | 22,453,713                 | loss                     | NA12878              |
| chr22      | 23,134,983                   | 23,135,483                 | loss                     | NA12878              |
