# Supplementary material for: Outlier-Based Identification of Copy Number Variations Using Targeted Resequencing in a Small Cohort of Patients with Tetralogy of Fallot
Source: PubMed Central journal article supplement (PMC3882271; doi:10.1371/journal.pone.0085375), 2014-01-06
Supplement: pone.0085375.s003.pdf [file pone.0085375.s003.pdf]

**Table S3. CNVs found in the five HapMap samples using type20 Dixon's Q test in the outlier-based CNV calling method.**

| <b>Chr</b> | <b>Start position (hg19)</b> | <b>End position (hg19)</b> | <b>Type of variation</b> | <b>HapMap sample</b> |
|------------|------------------------------|----------------------------|--------------------------|----------------------|
| chr1       | 152,573,211                  | 152,586,435                | loss                     | NA15510              |
| chr1       | 152,573,211                  | 152,586,435                | loss                     | NA19129              |
| chr1       | 155,234,407                  | 155,237,870                | gain                     | NA15510              |
| chr1       | 155,253,768                  | 155,261,736                | gain                     | NA15510              |
| chr2       | 240,981,511                  | 240,982,311                | gain                     | NA12878              |
| chr3       | 19,559,462                   | 19,930,107                 | gain                     | NA15510              |
| chr3       | 20,164,156                   | 20,187,926                 | gain                     | NA15510              |
| chr3       | 20,215,780                   | 20,216,280                 | gain                     | NA15510              |
| chr4       | 68,795,606                   | 68,925,183                 | gain                     | NA18517              |
| chr4       | 68,928,187                   | 68,928,787                 | gain                     | NA18517              |
| chr4       | 68,930,393                   | 68,934,496                 | gain                     | NA18517              |
| chr4       | 70,146,232                   | 70,146,832                 | loss                     | NA12878              |
| chr4       | 70,146,232                   | 70,146,932                 | loss                     | NA19129              |
| chr4       | 70,152,473                   | 70,160,559                 | loss                     | NA12878              |
| chr4       | 70,152,473                   | 70,160,559                 | loss                     | NA19129              |
| chr5       | 69,717,189                   | 69,718,089                 | gain                     | NA18517              |
| chr5       | 69,729,631                   | 69,730,131                 | gain                     | NA18517              |
| chr5       | 69,733,151                   | 69,733,651                 | gain                     | NA18517              |
| chr5       | 70,308,153                   | 70,308,753                 | gain                     | NA18517              |
| chr7       | 141,755,347                  | 141,758,103                | loss                     | NA12878              |
| chr7       | 75,045,612                   | 75,046,112                 | gain                     | NA19129              |
| chr7       | 99,564,684                   | 99,621,311                 | gain                     | NA15510              |
| chr9       | 108,456,919                  | 108,536,213                | gain                     | NA15510              |
| chr9       | 117,087,073                  | 117,092,300                | gain                     | NA15510              |
| chr9       | 40,773,663                   | 40,774,263                 | gain                     | NA12878              |
| chr9       | 41,590,682                   | 41,592,182                 | gain                     | NA12878              |
| chr11      | 4,967,401                    | 4,968,301                  | gain                     | NA19240              |
| chr11      | 5,878,066                    | 5,878,966                  | loss                     | NA19240              |
| chr11      | 6,190,624                    | 6,191,524                  | loss                     | NA19129              |
| chr11      | 7,817,616                    | 7,818,416                  | loss                     | NA19129              |
| chr11      | 7,817,616                    | 7,818,416                  | loss                     | NA19240              |
| chr12      | 133,721,045                  | 133,733,489                | gain                     | NA19240              |
| chr12      | 133,764,519                  | 133,768,587                | gain                     | NA19240              |
| chr12      | 133,778,781                  | 133,779,381                | gain                     | NA19240              |
| chr14      | 105,417,358                  | 105,418,158                | loss                     | NA12878              |
| chr14      | 105,417,358                  | 105,418,158                | loss                     | NA19129              |
| chr14      | 106,539,004                  | 106,539,504                | gain                     | NA19240              |
| chr14      | 106,780,499                  | 106,781,099                | gain                     | NA19240              |
| chr14      | 21,359,867                   | 21,423,999                 | loss                     | NA19240              |
| chr15      | 22,368,674                   | 22,369,374                 | gain                     | NA15510              |
| chr15      | 22,368,674                   | 22,369,374                 | gain                     | NA19240              |
| chr15      | 22,466,012                   | 22,466,512                 | gain                     | NA15510              |
| chr15      | 22,466,012                   | 22,466,512                 | gain                     | NA19240              |

|       |            |            |      |         |
|-------|------------|------------|------|---------|
| chr15 | 22,489,704 | 22,490,204 | gain | NA15510 |
| chr16 | 21,623,981 | 21,636,326 | gain | NA18517 |
| chr16 | 21,658,494 | 21,666,721 | gain | NA18517 |
| chr16 | 21,702,877 | 21,712,336 | gain | NA18517 |
| chr16 | 21,734,219 | 21,739,705 | gain | NA18517 |
| chr16 | 72,107,785 | 72,110,923 | gain | NA18517 |
| chr16 | 72,107,785 | 72,110,923 | gain | NA19240 |
| chr17 | 39,535,858 | 39,538,575 | gain | NA19240 |
| chr17 | 44,171,932 | 44,249,515 | gain | NA12878 |
| chr19 | 43,688,932 | 43,698,720 | gain | NA18517 |
| chr19 | 9,868,176  | 9,869,276  | loss | NA19129 |
| chr22 | 20,456,590 | 20,457,090 | gain | NA19129 |
| chr22 | 20,457,690 | 20,459,090 | gain | NA19129 |
| chr22 | 21,739,909 | 21,740,409 | gain | NA19129 |
| chr22 | 21,742,009 | 21,743,009 | gain | NA19129 |
| chr22 | 21,828,820 | 21,829,620 | gain | NA19129 |
| chr22 | 21,830,142 | 21,831,242 | gain | NA19129 |
| chr22 | 21,832,798 | 21,834,188 | gain | NA19129 |
| chr22 | 21,841,563 | 21,842,863 | gain | NA19129 |
| chr22 | 21,900,797 | 21,901,397 | gain | NA19129 |
| chr22 | 22,453,213 | 22,453,713 | loss | NA12878 |
| chr22 | 23,134,983 | 23,135,483 | loss | NA12878 |

---
